# Supplementary material for: Organic matter decay and bacterial community succession in mangroves under simulated climate change scenarios
Source: Springer Nature journal article supplement (doi:10.1007/s42770-024-01455-2), 2024-07-19
Supplement: MOESM1 [file 42770_2024_1455_MOESM1_ESM.pdf]

# Rothamsted Repository Download

## A - Papers appearing in refereed journals

Solano, J. H., Moitinho, M. A., Chiaramonte, J. B., Bononi, L., Packer, A. P., Dini-Andreote, F., Tsai, S. M. and Taketani, R. G. 2024. Organic matter decay and bacterial community succession in mangroves under simulated climate change scenarios. *Brazilian Journal of Microbiology*.  
<https://doi.org/10.1007/s42770-024-01455-2>

The publisher's version can be accessed at:

- <https://doi.org/10.1007/s42770-024-01455-2>
- <https://link.springer.com/article/10.1007/s42770-024-01455-2>

The output can be accessed at: <https://repository.rothamsted.ac.uk/item/99108/organic-matter-decay-and-bacterial-community-succession-in-mangroves-under-simulated-climate-change-scenarios>.

© 19 July 2024, Please contact [library@rothamsted.ac.uk](mailto:library@rothamsted.ac.uk) for copyright queries.

**Table S1. Comparison of the flux of emission of CO<sub>2</sub> and CH<sub>4</sub> in microcosms of mangrove sediments during leaf litter during 45 days of degradation. Incubated under different pHs and temperature.**

| Incubation condition | Average emission flow of CO <sub>2</sub> (µg C cm <sup>-2</sup> day <sup>-1</sup> ) |                     |                       |                       |
|----------------------|-------------------------------------------------------------------------------------|---------------------|-----------------------|-----------------------|
|                      | <i>R. mangle</i>                                                                    | <i>L. racemosa</i>  | <i>A. schaueriana</i> | Control               |
| 29.5°C               | 580.46 <sup>a</sup>                                                                 | 489.92 <sup>a</sup> | 551.37 <sup>A</sup>   | -177.10 <sup>a'</sup> |
| 27.5°C               | 823.18 <sup>a</sup>                                                                 | 275.37 <sup>a</sup> | 248.09 <sup>B</sup>   | 156.16 <sup>b'</sup>  |
| pH 7.05              | 582.29 <sup>a</sup>                                                                 | 380.75 <sup>A</sup> | 381.16 <sup>A</sup>   | -2.57 <sup>a'</sup>   |
| pH 6.74              | 821.35 <sup>a</sup>                                                                 | 384.53 <sup>A</sup> | 418.3 <sup>A</sup>    | -18.56 <sup>a'</sup>  |

  

| Incubation condition | Average emission flow of CH <sub>4</sub> (µg CO <sub>2eq</sub> .cm <sup>-2</sup> day <sup>-1</sup> ) |                    |                       |                      |
|----------------------|------------------------------------------------------------------------------------------------------|--------------------|-----------------------|----------------------|
|                      | <i>R. mangle</i>                                                                                     | <i>L. racemosa</i> | <i>A. schaueriana</i> | Control              |
| 29.5°C               | 183.86 <sup>a</sup>                                                                                  | 59.13 <sup>A</sup> | 345.16 <sup>a</sup>   | -46.75 <sup>a'</sup> |
| 27.5°C               | 203.89 <sup>a</sup>                                                                                  | 9.94 <sup>B</sup>  | 126.33 <sup>b</sup>   | -13.94 <sup>b'</sup> |
| pH 6.74              | 195.81 <sup>A</sup>                                                                                  | 38.40 <sup>A</sup> | 282.75 <sup>a</sup>   | -26.52 <sup>a'</sup> |
| pH 7.05              | 191.81 <sup>A</sup>                                                                                  | 30.67 <sup>A</sup> | 188.74 <sup>a</sup>   | -34.17 <sup>a'</sup> |

\*different letters over each value indicate significant differences in Tukey's HSD test with  $\alpha$  0.05. capital letters indicate differences between different pH treatment and regular letters indicate differences between temperature treatments.

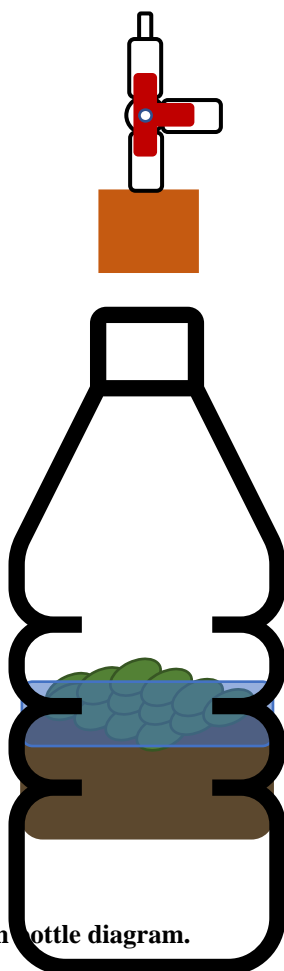

**Figure S1: Microcosm bottle diagram.**

*Rhizophora mangle*

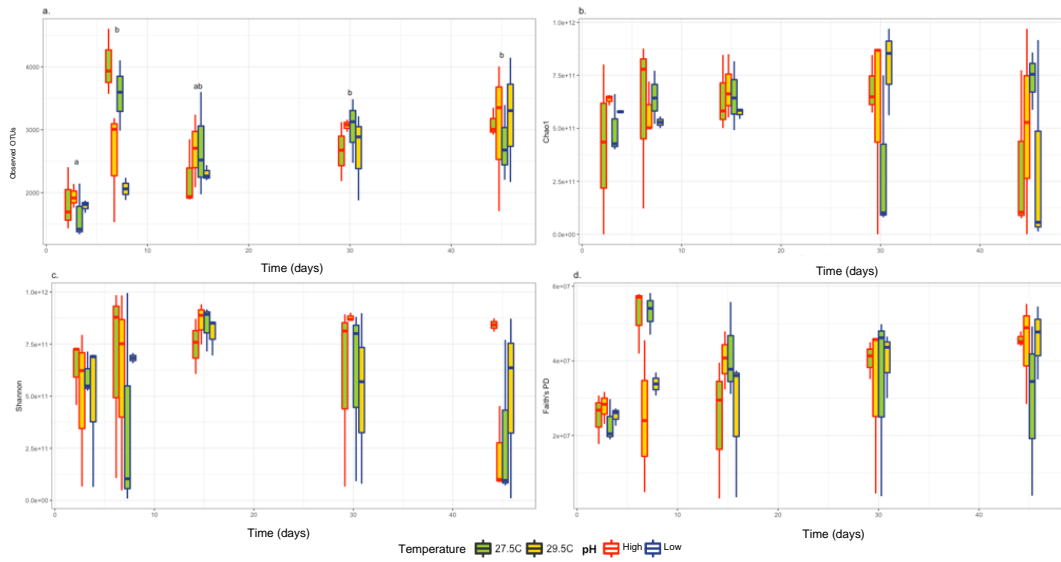

*Laguncularia racemosa*

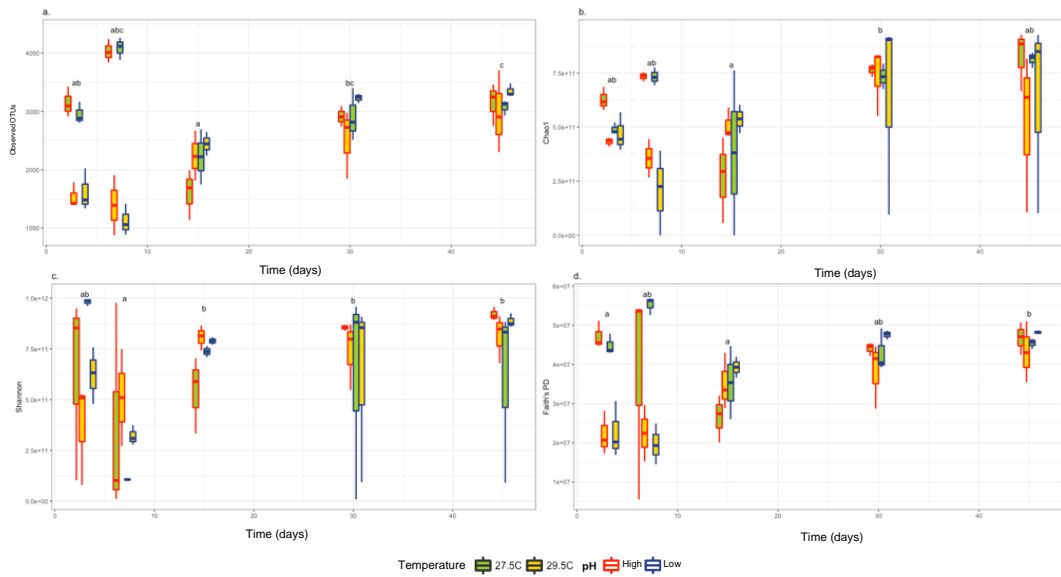

*Avicennia schaueriana*

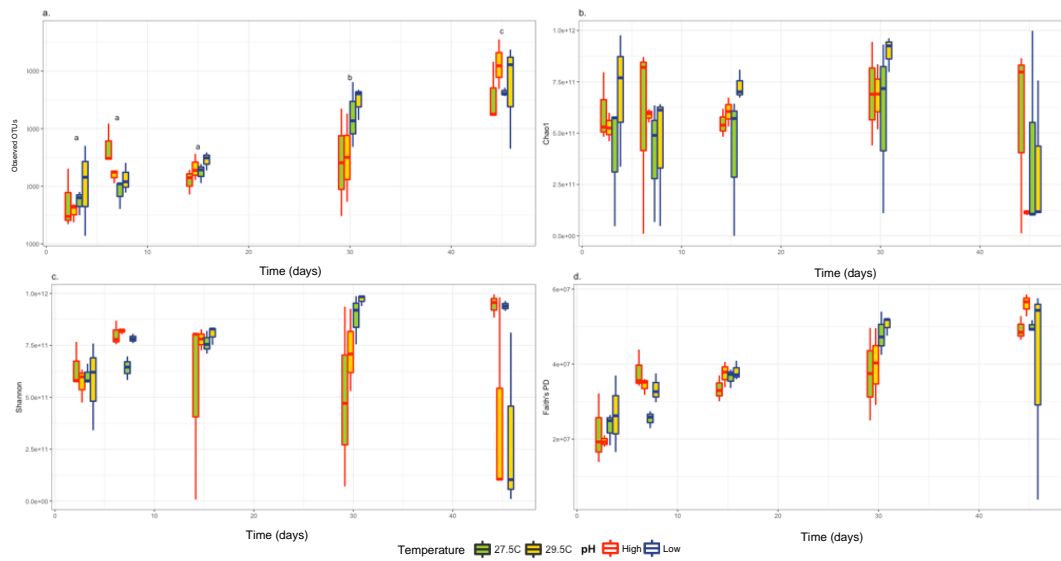

**Figure S2. Comparison of the results of diversity indexes obtained** from the bacterial community 16S rRNA gene sequencing obtained from in microcosms of mangrove sediments during leaf litter decomposition. Samples are color coded according to the legend (a.) **Observed OTUs**; (b.) **Richness**

estimator Chao1; **(c.)** Shannon's H' diversity index e **(d.)** Faith's phylogenetic diversity (PD). Letters on top of samples indicate a significant difference in Tukey's HSD with an  $\alpha$  of 0.05

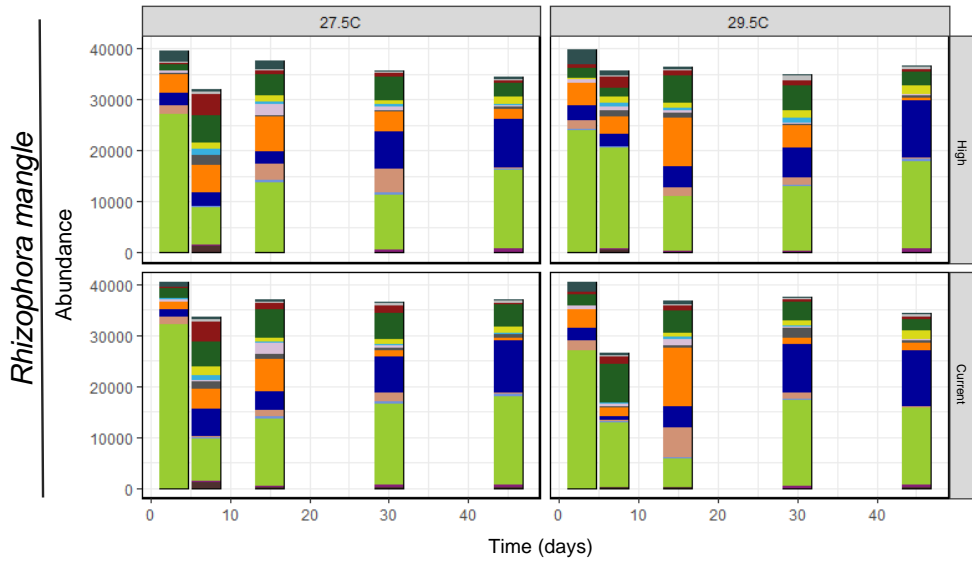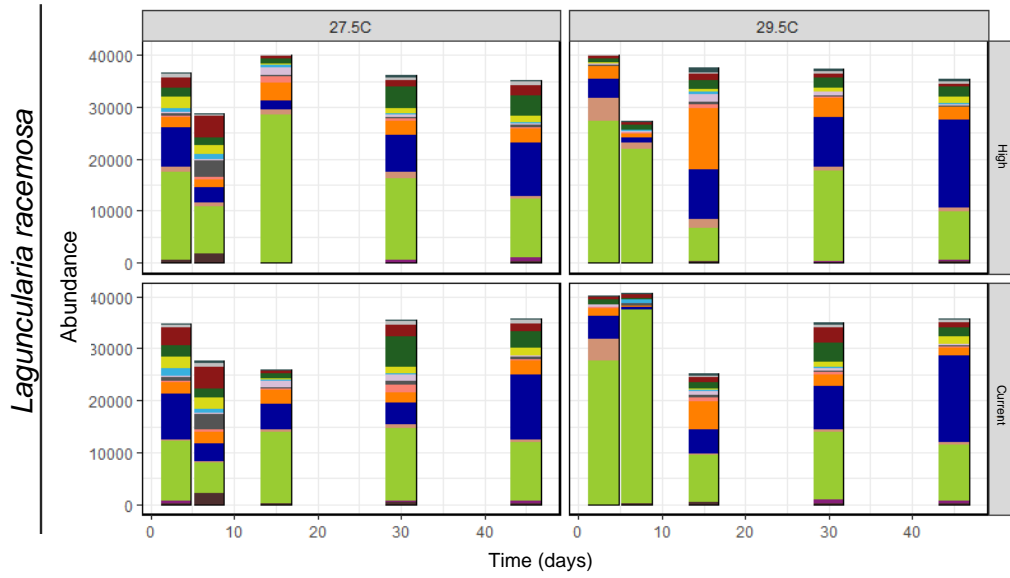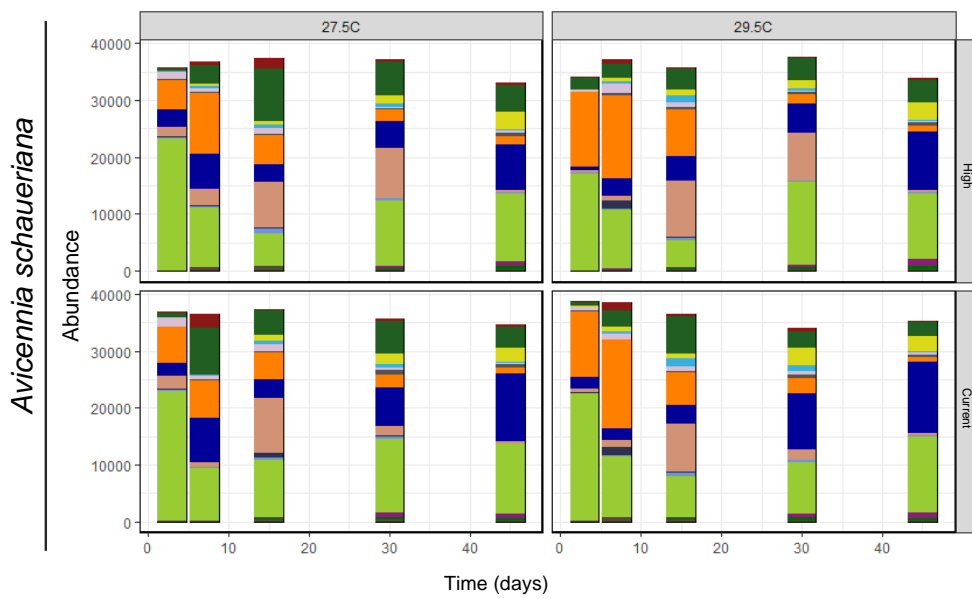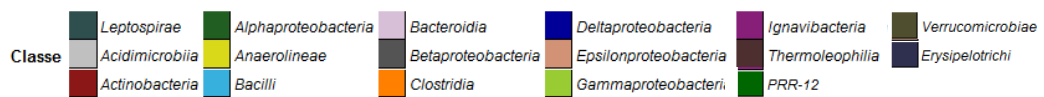

**Figure S3.** Composition of the bacterial community 16S rRNA gene sequencing obtained from in microcosms of mangrove sediments during leaf litter decomposition. The Y-axis represents the number of reads after rarefaction to 40,000 reads per sample.

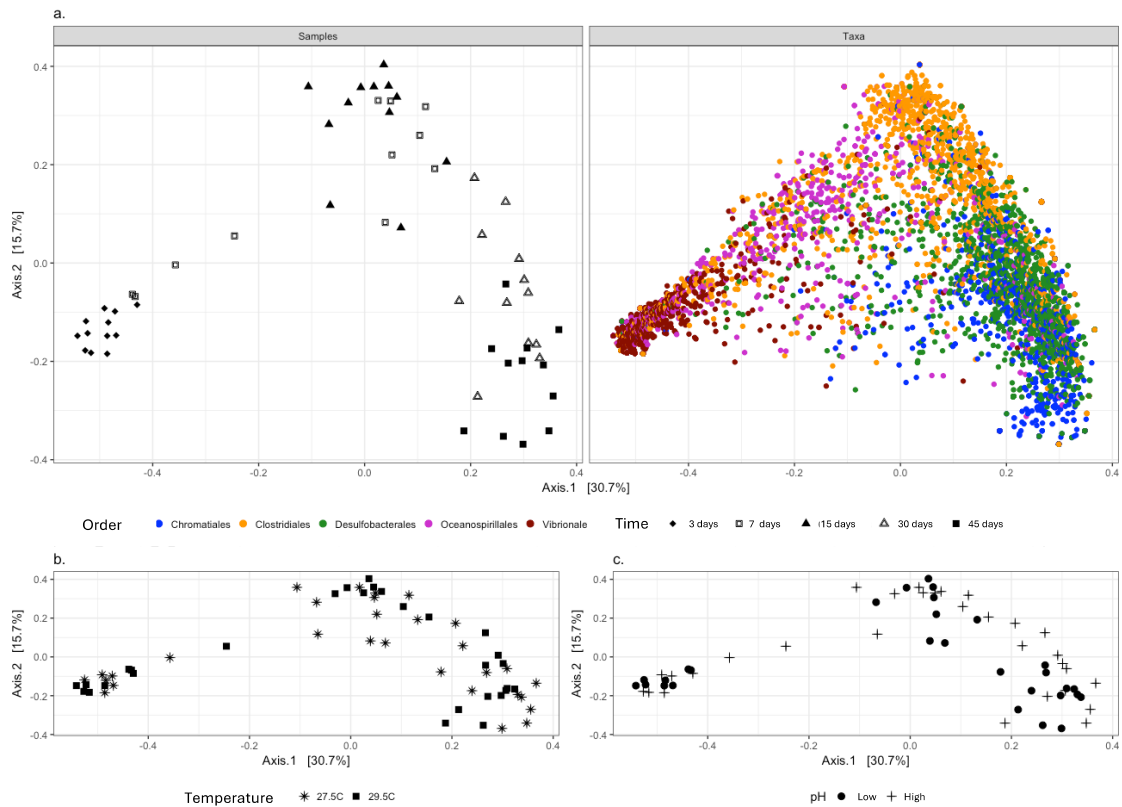

**Figure S4.** Principal coordinate analysis (PCoA) based on a distance matrix of Bray-Curtis of the bacterial community of decaying leaves of *Rhizophora mangle*. Samples are coded according to (a.) Time and order (OTU plot); (b.) temperature e (c.) pH.
